# 1 Neural divergence and hybrid disruption between ecologically isolated 2 *Heliconius* butterflies

3

4 Stephen H. Montgomery<sup>1,2</sup>, Matteo Rossi<sup>2,3</sup>, W. Owen McMillan<sup>2</sup>, Richard M. Merrill<sup>2,3</sup>

5

## 6 **Affiliations**

7 <sup>1</sup> School of Biological Science, University of Bristol, 24 Tyndall Avenue, Bristol, UK, BS8 1TQ

8 <sup>2</sup> Smithsonian Tropical Research Institute, Gamboa, Panama

9 <sup>3</sup> Division of Evolutionary Biology, Ludwig-Maximilians-Universität, München, Germany

10

11 **Correspondence:** [s.montgomery@bristol.ac.uk](mailto:s.montgomery@bristol.ac.uk)

12

## 13 **Summary**

14 The importance of behavioural evolution during speciation is well established, but we know little  
15 about how this is manifest in sensory and neural systems. Although a handful of studies have  
16 linked specific neural changes to divergence in host or mate preferences associated with  
17 speciation, how brains respond to broad environmental transitions, and whether this contributes  
18 to reproductive isolation, remains unknown. Here, we examine divergence in brain morphology  
19 and neural gene expression between closely related, but ecologically distinct, *Heliconius*  
20 butterflies. Despite on-going gene flow, sympatric species pairs within the *melpomene-cydno*  
21 complex are consistently separated across a gradient of open to closed forest and decreasing  
22 light intensity. By generating quantitative neuroanatomical data for 107 butterflies, we show that  
23 *H. melpomene* and *H. cydno* have substantial shifts in brain morphology across their geographic  
24 range, with divergent structures clustered in the visual system. These neuroanatomical  
25 differences are mirrored by extensive divergence in neural gene expression. Differences in both  
26 morphology and gene expression are heritable, exceed expected rates of neutral divergence, and  
27 result in intermediate traits in first generation hybrid offspring. This likely disrupts neural system  
28 function, leading to a mismatch between the environment and the behavioral response of hybrids.  
29 Our results suggest that disruptive selection on both neural function and external morphology  
30 result in coincident barriers to gene flow, thereby facilitating speciation.

31

## 32 **Keywords:**

33 Brain evolution, ecological speciation, neuroecology, niche partitioning, reproductive isolation

34

## 35 Introduction

36

37 Ecological adaptation is a major force driving the evolution of new species [1,2]. Although it is  
38 well established that divergent selection can influence behavioural traits and promote speciation  
39 [3], there are few empirical examples of how divergent selection acts on the underlying sensory  
40 and neural systems. For example, existing studies on adaptation across divergent light regimes  
41 have largely focused on the peripheral sensory systems, often in the context of divergent mate  
42 preference [4,5]. However, sensory perception is only the first of many mechanisms within the  
43 nervous systems that may experience divergent selection, and mating preferences are only one  
44 of many behaviours that may that can be affected by the environment, and consequently  
45 contribute to reproductive isolation. Behavioural challenges imposed by novel environments can  
46 instead be met by changes in how sensory information is processed, often reflected in differential  
47 investment in brain components that refines the sensitivity, acuity to, or integration of, different  
48 stimuli.

49 The intimate relationship between brain structure and ecology is apparent in many  
50 comparative studies of neuroanatomy. For example, the expansion of visual pathways in primates  
51 [6], cerebellar expansion and refinement of the extero-lateral nucleus in electric fish [7–9], the  
52 contrasting adaptations of diurnal and nocturnal lifestyles in hawk moths [10], and the  
53 independent colonization of cave systems that underlie the radiation in Mexican cavefish [11], all  
54 indicate the importance of neuroanatomical adaptations to contrasting ecological needs.  
55 However, these comparative studies generally focus on phylogenetically distinct comparisons  
56 across relatively distantly related species. At the other extreme, several studies considering inter-  
57 specific variation across populations, or between eco-morphs, instead highlight the potential for  
58 *plasticity* in brain development to optimize brain structure and function to local conditions [12–14].

59 Between these population and phylogenetic levels there is a scarcity of information about  
60 the role brains play in facilitating speciation across environmental gradients, either through  
61 developmental plasticity or the accumulation of heritable changes during ecological divergence.  
62 Hence, whether evolutionary changes in neural systems play a causative role in ecological  
63 divergence [15], or accumulate later in this process, is unknown. A handful of insect studies have  
64 linked specific changes in neural processing to the evolution of reproductive isolation among close  
65 relatives, however these specifically focus on divergent host preferences and the detection of host  
66 cues [16–22]. Whether brains respond to changes in broader features of the environment, such  
67 as luminance or habitat structure, at a similar time scale is yet to be established. Recently, studies  
68 of closely related populations on the path to speciation have begun to address this question

69 [11,13,23,24]. Importantly, however, these studies are often unable to disentangle the effects of  
70 drift and selection, and have not determined whether hybrids between ecologically distinct  
71 populations show disrupted or intermediate brain morphologies that may betray major fitness  
72 deficits, and therefore support a more causative role for divergence in neural systems during the  
73 incipient stages of speciation.

74 Here, we investigate the role of heritable divergence in neuroanatomy and gene  
75 expression in a clade of closely related *Heliconius* butterflies. *Heliconius* are well known for their  
76 bright warning patterns and Müllerian mimicry [25,26]. Speciation events within the *melpomene-*  
77 *cydno* complex are also often associated with ecological transitions [27–29], and habitat  
78 partitioning among sister taxa is generally required for complete speciation [30,31]. In particular,  
79 within the *melpomene-cydno* clades, coexisting species are often found in “mosaic sympatry”,  
80 with sister taxa inhabiting relatively open forest-edge, or closed canopy forest, respectively  
81 [30,32,33]. These environmental differences are associated with changes in light environment,  
82 and *melpomene/cydno* show evidence of divergence in peripheral eye structure and light  
83 sensitivity [34,35]. We hypothesised these differences in habitat-use therefore impose different  
84 sensory challenges, leading to consistent, divergent changes in brain structure and function.

85

86

87

88

89

90

91

92

93

94

95

96

97

98

99

100

## 101 Results and discussion

102

### 103 *Divergence in neuroanatomy in the Heliconius melpomene-cydno complex*

104 To investigate the effects of ecological divergence on brain morphology within the *melpomene-*  
105 *cydno* complex, we sampled butterflies from Costa Rica, Panama, Peru, and French Guiana  
106 (Figure 1). Where members of the *melpomene* and *cydno* clades are sympatric, the species  
107 boundary is maintained by ecological divergence and disruptive selection against hybrids, which  
108 now occur at low frequencies [36].

109

110

111

112

113

114

115

116

117

118

119

120

121

122

123

124

125

126

127

128

129

130

131

132

133

134

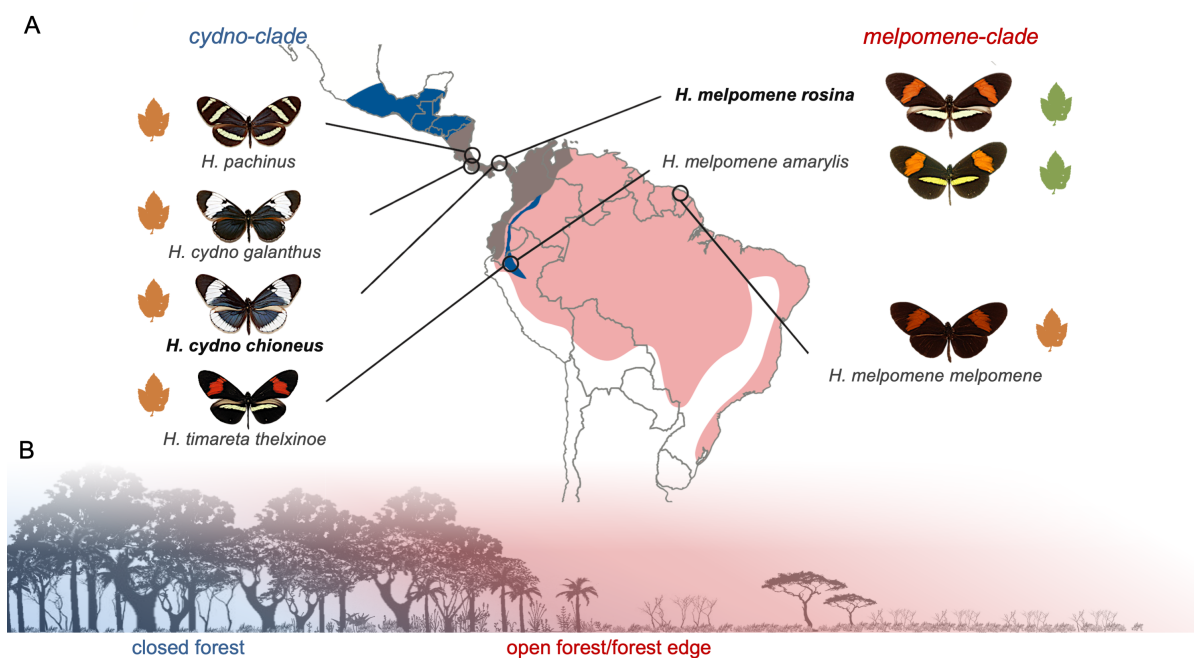

**Figure 1. Population sampling and ecological divergence. (A)** Outline map of Central and South America showing the range of the *cydno* clade (blue), the *melpomene* clade (red), and their overlap (brown). Circles indicate sampled populations in Costa Rica, Panama, Peru and French Guiana with relevant races shown. In the Andes, the *cydno* clade species *H. timareta* is restricted to high elevations, but overlaps with *H. melpomene* at its lower margins. Green *Passiflora* sp. leaves indicate oligophagous races that are host-plant specialists, orange leaves indicate polyphagous host-plant generalists that lay on multiple *Passiflora* species. Races included in the common garden experiments are shown in bold. **(B)** Illustration of niche partitioning between *melpomene* (red; open forest, forest edge) and *cydno* (blue; closed forest).

135           Across all populations, the average volume of the combined optic lobes neuropils (OL) is  
136 significantly larger in *cydno* clade species (including *H. cydno*, *H. pachinus* and *H. timareta*) than  
137 *H. melpomene* ( $n=77$ ,  $X^2=17.354$ ,  $p<0.001$ ), and is not explained by allometric scaling ( $y$ -axis shift  
138 in  $OL \sim rCBR$ :  $X^2=12.260$ ,  $p<0.001$ ; Figure 2C). Five of the six optic lobe neuropils are significantly  
139 larger in the *cydno* clade (Figure 2C,D-I; Table S3), with the sole exception being the lobula. For  
140 a given brain size, these neuropils are between 13-27% larger in *cydno*, suggesting altered  
141 patterns of investment are unequal across structures. However, in each case the increase is  
142 associated with grade-shifts in allometric scaling (Table S4). These structures are vital for  
143 summation and parallelization of photoreceptor signals [37–39], and a diverse range of visual  
144 processes including colour vision [40–42], shape and motion detection, maneuverability in flight  
145 [43,44], and circadian rhythms [45]. The ventral lobula (vLOB), which is only present in some  
146 butterflies [46–49], also acts as a relay centre sending visual information to the mushroom body  
147 [49], the major site of insect learning and memory.

148           The anterior optic tubercle (AOTU) is also 23% larger in the *cydno*-clade populations  
149 ( $X^2=10.050$ ,  $p<0.001$ ). The AOTU is the most prominent optic glomerulus in the central brain, and  
150 is involved in processing sky-light and spectral cues, as well as polarised light [50–52]. Contrary  
151 to claims that there is a trade-off between investment in major insect visual and olfactory neuropils  
152 [53], we find no evidence of volumetric shifts in the antennal lobe ( $X^2=0.615$ ,  $p=0.615$ ). Excluding  
153 the AOTU, no other central brain neuropil shows robust evidence for non-allometric expansion  
154 (Table S3, S4). Divergence in brain structure is therefore restricted to neuropils associated with  
155 visual processing. *H. melpomene* and *H. cydno* occupy forest of different light intensities and  
156 physical structure [25,30,32,33], differential investment in these neuropils therefore likely reflects  
157 contrasting demands on visual processing. Consistent with this interpretation, *H. cydno* responds  
158 to lower intensities of light than *H. melpomene* [34].

159  
160  
161  
162  
163  
164  
165  
166  
167

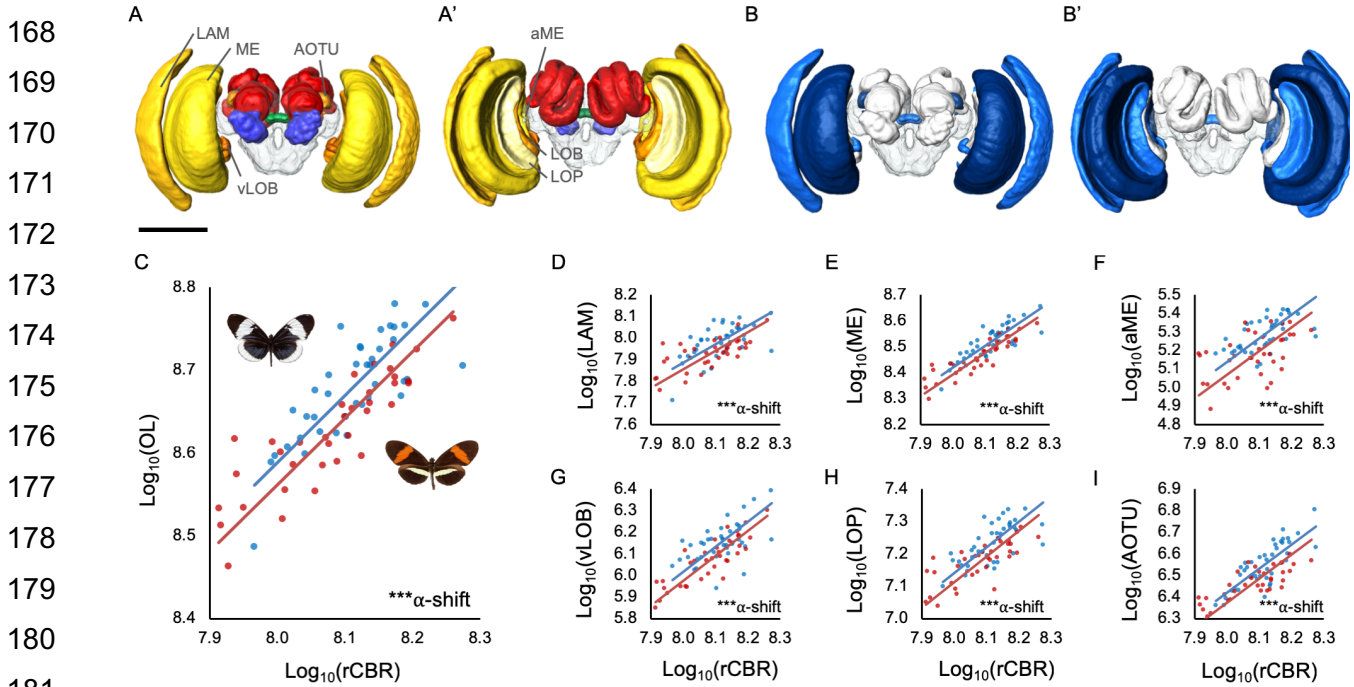

**Figure 2. Divergence in brain morphology between *H. melpomene* and *H. cydno*** (A) 3D volumetric models of a *Heliconius* brain showing segmented neuropils from anterior (A) and posterior (A') views; visual neuropils in yellow-oranges, antennal lobe in blue, the central complex in green, the mushroom bodies in red, and the unsegmented rCBR clear. Visual neuropils discussed in the main text are labeled as: LAM is lamina; ME is medulla; aME is accessory medulla; LOB is lobula; LOP is lobula plate; vLOB is ventral lobula; AOTU is anterior optic tubercle. (B) 3D volumetric models of a *Heliconius* brain showing segmented neuropils from anterior (A) and posterior (A') views where blue neuropils are significantly different in size between *H. melpomene* and *H. cydno*, with darker neuropils indicating higher significance. Scale in A/B is 500  $\mu\text{m}$ . (C) Grade-shift in the scaling relationship between optic lobe (OL) and central brain (rCBR) volume between *H. melpomene* and *H. cydno*. (D-I) Non-allometric shifts in the size of individual visual neuropils between *H. melpomene* and *H. cydno*; lamina (LAM), medulla (ME), accessory medulla (aME), ventral lobula (vLOB), lobula plate (LOP) and anterior optic tubercle (AOTU).

201 *Distinct patterns of intra-clade variation reveal a consistent role of ecology in shaping brain*  
202 *morphology*

203 To further understand the origins of differential investment in visual neuropil, we next considered  
204 variation within the *H. cydno* and *H. melpomene* clades. Despite evidence of genetic sub-  
205 structuring [54], brain morphology was highly consistent across the four *cydno*-clade populations  
206 we sampled, with no neuropil showing significant geographic variation (Table S3B). In contrast,  
207 we do find evidence of variation across geographic races of *H. melpomene*, both in total optic  
208 lobe volume ( $X^2=9.917$ ,  $p=0.007$ ) and for several of the individual visual neuropils that differentiate  
209 the *H. cydno* and *H. melpomene* clades (Table S3B, S4A). These include the largest visual  
210 neuropil, the medulla ( $X^2=11.161$ ,  $p=0.004$ ), and the AOTU ( $X^2=9.647$ ,  $p=0.008$ ). Post-hoc  
211 analysis reveals that these results are not driven solely by a single divergent population (Table  
212 S3C), raising the possibility that *H. melpomene* may occupy more visually heterogeneous habitats  
213 than *H. cydno*, and may be tracking local sensory conditions.

214 Despite greater variability within *H. melpomene*, comparisons between sympatric species  
215 pairs suggest a consistent pattern of investment between *melpomene* and *cydno* clade  
216 populations. In Panama, *H. m. rosina* and *H. c. chioneus*, are differentiated by total optic lobe  
217 volume ( $X^2=12.708$ ,  $p<0.001$ ), with 5 of 7 visual neuropils having larger volumes in *H. cydno*  
218 (Table S3A). Similarly, in Peru, *H. m. amaryllis* and *H. timareta thelxinoe* vary in total optic lobe  
219 volume ( $X^2=6.773$ ,  $p=0.009$ ) and the two largest visual neuropils, the medulla and lamina (Table  
220 S3A). Given *H. m. amaryllis* and *H. t. thelxinoe* are co-mimics and do not appear to distinguish  
221 conspecifics using visual cues [55], the shift in visual investment is unlikely to be related to mate  
222 choice. In contrast, divergence between *H. c. galanthus* and *H. pachinus*, which are ecologically  
223 equivalent but geographically isolated across Costa Rica's central valley [30,56,57], show no  
224 evidence of neuroanatomical divergence despite strong visual mate preferences [57], supporting  
225 the causative role of divergent ecologies (Table S4C). Comparisons between *H. m. melpomene*,  
226 which is allopatric with respect to *H. cydno*, to all *cydno* populations also detects evidence of  
227 divergence in OL volume ( $X^2=4.974$ ,  $p=0.026$ ) with levels of phenotypic divergence comparable  
228 to other *melpomene* races (Table S4B). This suggests an absence of strong character  
229 displacement for this trait.

230  
231  
232  
233

234 *Neuroanatomical differences are heritable*

235 We next reared *H. melpomene rosina* and *H. cydno chioneus* under common garden conditions  
236 to determine whether the variation we observe is heritable. As in our comparisons between wild-  
237 caught individuals, we observed a non-allometric expansion of the optic lobe in insectary reared  
238 *H. cydno* (33%;  $n=20$ ,  $X^2=11.363$ ,  $p=0.001$ ; Table S5). This was driven by volumetric increases  
239 ranging from 24-57% across specific visual neuropils in *H. cydno*, including 5 of the 6 structures  
240 that differed between wild-caught individuals (Table S5). The most pronounced shifts were found  
241 in the lamina (57% larger,  $X^2=13.702$ ,  $p<0.001$ ), vLOB (49%,  $X^2= 6.359$ ,  $p<0.001$ ) and AOTU  
242 (40%,  $X^2=21.749$ ,  $p<0.001$ ). We found no evidence that the extent of divergence for any individual  
243 neuropil was higher in wild-caught than common-garden individuals (Table S5C). Differences in  
244 brain morphology therefore appear to have a substantial heritable component, and are not the  
245 product of environmentally-induced plasticity during development.

246

247 *Neuroanatomical divergence is likely driven by natural selection*

248 Allometric scaling among traits, where component sizes vary consistently with total size, is  
249 evidence for constraint on trait evolution [58–61], including on brain structure [62,63]. This  
250 suggests populations evolving under genetic drift should follow conserved allometric scaling  
251 relationships, as is typical among recently diverged taxa [60]. In contrast, our observation of non-  
252 allometric variation of brain components, among both wild caught and common-garden reared  
253 individuals, strongly implicates divergent natural selection.

254 To further test the role for selection, we calculated  $P_{ST}$  for variation in neuropil volumes in  
255 Panamanian *H. m. rosina* and *H. c. chioneus* raised under common garden conditions.  $P_{ST}$  is a  
256 direct phenotypic analogue of  $F_{ST}$  and measures population differentiation relative to the total  
257 variance across populations [64]. Comparisons between  $P_{ST}$  and  $F_{ST}$  can therefore be used as a  
258 direct test of selection. After accounting for allometric effects,  $P_{ST}$  significantly exceeds genome-  
259 wide  $F_{ST}$  [65] for total optic lobe size (adjusted- $p=0.011$ ), lamina (adjusted- $p=0.006$ ), medulla  
260 (adjusted- $p=0.020$ ), lobula (adjusted- $p=0.016$ ), vLOB (adjusted- $p=0.005$ ), and AOTU (adjusted-  
261  $p=0.005$ ), consistent with the action of divergent natural selection. Although inferences made from  
262  $P_{ST}$  can be vulnerable to underlying assumptions regarding trait heritability [64], our results are  
263 robust across a broad range of quantitative genetic scenarios (Table S7; Supplementary  
264 Information).

265 As a further test for selection acting across the *melpomene-cydno* complex, we performed  
266 a partial-Mantel test to assess whether pairwise divergence in brain morphology between wild



267 populations is predicted by levels of neutral genetic divergence ( $F_{ST}$ ). Here, we expect that the  
268 presence of divergent selection would erode the relationship between genetic distance and  
269 phenotypic divergence [66]. After allometric correction, only two neuropils, the antennal lobe and  
270 lobula, show patterns of divergence consistent with neutral expectations (Table S7). The lack of  
271 association for any neuropils with divergent volumes between *H. melpomene* and *H. cydno* again  
272 implies our results are not explained by drift.

273 Together, evidence i) of non-allometric divergence in brain structure, ii) between-species  
274 variation that significantly exceed neutral predictions under controlled environmental conditions,  
275 and iii) a lack of association between phenotypic and genetic divergence across the *melpomene-*  
276 *cydno* complex, strongly implicates natural selection as the driving force behind the observed  
277 differences in neuroanatomical structures.

278

### 279 *Neuroanatomical evolution is mirrored by shifts in neural gene expression*

280 Volumetric changes in neuroanatomy likely indicate difference in cell number or size, which may  
281 in turn reflect replicated or divergent circuitry. Shifts in neural physiology or activity are also be  
282 behaviorally important but will not be captured in morphometric data. These differences, however,  
283 can be captured in differential patterns of gene expression between species. We therefore also  
284 examined patterns of gene expression between *H. m. rosina* and *H. c. chioneus*, raised in  
285 common garden conditions to control for environmental effects. After accounting for the influence  
286 of tissue composition [67], we still detect significant levels of interspecific divergence in expression  
287 profiles for age and environment-matched individuals (Figure 4A, Figures S1-3). This pattern is  
288 consistent across two independent periods of tissue collection. Differentially expressed genes are  
289 enriched for molecular functions linked to cytoskeletal and transmembrane channel activities  
290 (Table S8), consistent with changes in brain physiology being achieved through alterations of  
291 neuronal wiring or activity.

292 Differential expression between species could be explained by genetic drift, rather than  
293 divergent selection. However, estimated  $P_{ST}$  exceeds  $F_{ST}$  exceeds genome-wide  $F_{ST}$  for 18.5%  
294 (305/1647) of differentially expressed genes, strongly implicating divergent selection as a driver  
295 behind at least some shifts in neural gene expression. Consistent with this hypothesis,  $f_d$ , a  
296 measure of shared allelic variation that is used to infer barriers to gene flow [68], is negatively  
297 correlated with values of  $P_{ST}$  for neural gene expression, even after accounting for variation in  
298 recombination rate ( $\chi^2 = 179.0$ ,  $p \ll 0.001$ ). Previous genome-wide analyses have highlighted a  
299 highly heterogeneous pattern of genetic divergence between *H. m. rosina* and *H. c. chioneus*,  
300 with selection against gene flow acting across the genome [65,68]. This suggests the species

301 barrier is determined by multiple, polygenic traits. Because  $f_d$ , and by extension  $P_{ST}$ , is not  
302 clustered across the genome [68], our data is consistent with this inference. We therefore suggest  
303 that divergence in neural traits is shaping part of the landscape of genetic differentiation between  
304 *H. m. rosina* and *H. c. chioneus*.

305

#### 306 *Hybrids show evidence of trait disruption*

307 Reproductive isolation can arise due to a mismatch between intermediate hybrid phenotypes and  
308 the environment, such that hybrids suffer lower fitness in either parental environment [1,2]. To  
309 explore whether divergent brain structures might contribute to the fitness deficit of hybrids, we  
310 produced multiple F1 crosses between *H. m. rosina* and *H. c. chioneus*. We focus on F1  
311 individuals, which account for a major proportion of natural *Heliconius* hybrids [36]. Multivariate  
312 analysis of the seven visual neuropils reveals that hybrids show intermediate brain morphologies  
313 (Figure 3A; Table S6). This intermediate state is the product of variable dominance effects on  
314 specific neuropil (Figure 3B-E; Table S6). Four of the seven neuropil are significantly larger in *H.*  
315 *cydno* than F1 hybrids, but are not significantly different between F1s and *H. melpomene* (Table  
316 S6B), suggesting that these are largely influenced by loci with *melpomene*-dominant alleles. In  
317 contrast, two neuropil, the lamina and vLOB, are significantly different between F1s and both  
318 parental species (Figure 3B,C; Table S6B) implying incomplete or mixed dominance across  
319 multiple loci. Importantly, this mosaic pattern also leads to disrupted scaling relationships between  
320 some visual neuropil, which may affect the flow and integration of visual information in the brain  
321 (Table S6C,D; Figure S1; Supplementary Information).

322

323

324

325

326

327

328

329

330

331

332

333

334

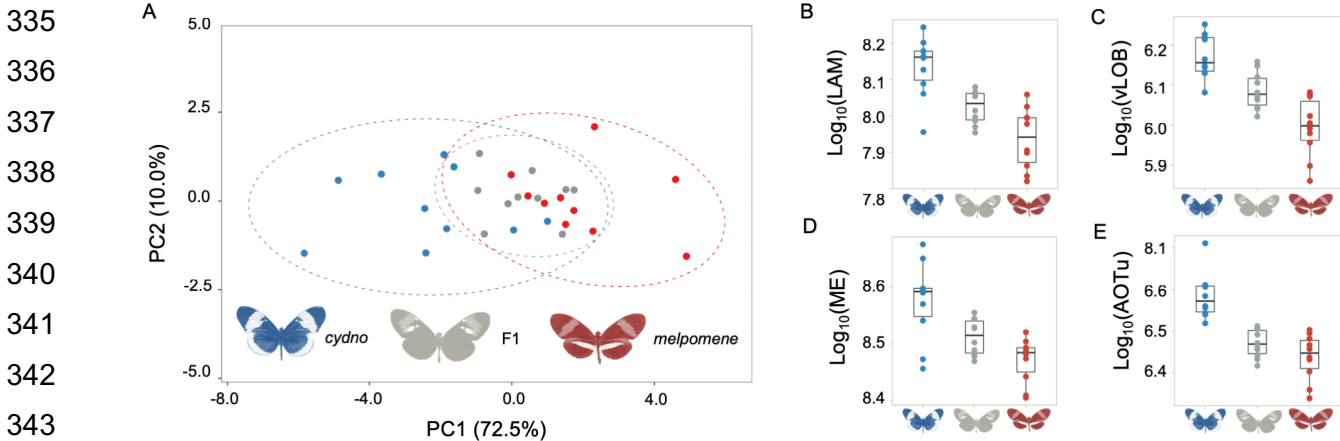

**Figure 3. Intermediate brain morphology in *H. m. rosina* x *H. c. chioneus* F1 hybrids (A)** Variation in *H. m. rosina* (red), *H. c. chioneus* (blue) and hybrid (grey) brain morphology in a principal component analysis of all segmented neuropils and rCBR. **(B-E)** Examples of neuropils with intermediate volumes in hybrids (B,C), or *melpomene*-like volumes (D, E) in F1 hybrids; lamina (LAM), ventral lobula (vLOB), medulla (ME), and anterior optic tubercule (AOTu).

We observed a similar pattern of hybrid disruption at the molecular level (Figure 4, Figure S3, S4). Focusing on genes that are differentially expressed between *H. cydno* and *H. melpomene*, F1 hybrids cluster outside the range of both parental species (Figure 4A). As was inferred for the visual neuropils, the expression of individual genes show variable patterns of dominance (Figure S5): 36% of differentially expressed genes are ‘*melpomene*-like’ in F1 hybrids, 21% are ‘*cydno*-like’, and 43% are statistically intermediate. Consistent with divergent selection playing a role in gene expression evolution, genes with intermediate expression in F1 hybrids show increased levels of  $P_{ST}$  ( $X^2=5825.9$ ,  $p < 0.001$ ), with a greater proportion (23%) of intermediate genes showing  $P_{ST}$  values in excess of genome-wide  $F_{ST}$ , compared to genes with *melpomene*-like (9%) or *cydno*-like expression (7%). In contrast, only 0.01% of genes with consistent expression between *H. cydno* and *H. melpomene*, and no genes with transgressive expression in hybrids, show such signatures of selection (Figure 4B). Again, these results are robust across a broad range of quantitative genetic scenarios (Figure S6). In addition, as expected given their enrichment for high  $P_{ST}$  values, genes with intermediate hybrid expression are more likely to coincide with regions of reduced gene flow than other differentially expressed genes ( $X^2=116.1$ ,  $p < 0.001$ ; Figure 4C).

Our results therefore reveal both divergence of neural phenotypes between ecologically distinct populations, and disruption of these phenotypes in F1 hybrids. We suggest these intermediate neural phenotypes are likely to act as barriers to gene flow. Divergence in gene expression is a major source of genetic incompatibilities between species [69–71], and cause

369 abnormal development and reduce survival [72]. Hybrid disruption of expression profiles has been  
 370 reported in diverging species pairs [72–77], however the majority of these studies focus on  
 371 homogenized whole bodies or gonads. Where organ specific profiles are included, it has been  
 372 suggested that gonads have an excess of disrupted genes relative to brain tissue [78], and may  
 373 drive signals from whole-body samples. Nevertheless, some evidence points to the importance  
 374 of divergence in neural gene during ecological divergence [79,80], and phylogenetic comparisons  
 375 of neural gene expression in *Heliconius* provide some evidence of selection at deeper time scales  
 376 [81]. Our data adds clear support for this hypothesis. More broadly, disruption of components of  
 377 the sensory systems, that co-evolve within species but are under divergent selection between  
 378 species, likely alters the way in which environmental stimuli are perceived and processed. This  
 379 occurs at anatomical and molecular levels and may lead to a mismatch between the visual system  
 380 of hybrids and their sensory environment.

381

382

383

384

385

386

387

388

389

390

391

392

393

394

395

396

397

398

399

400

401

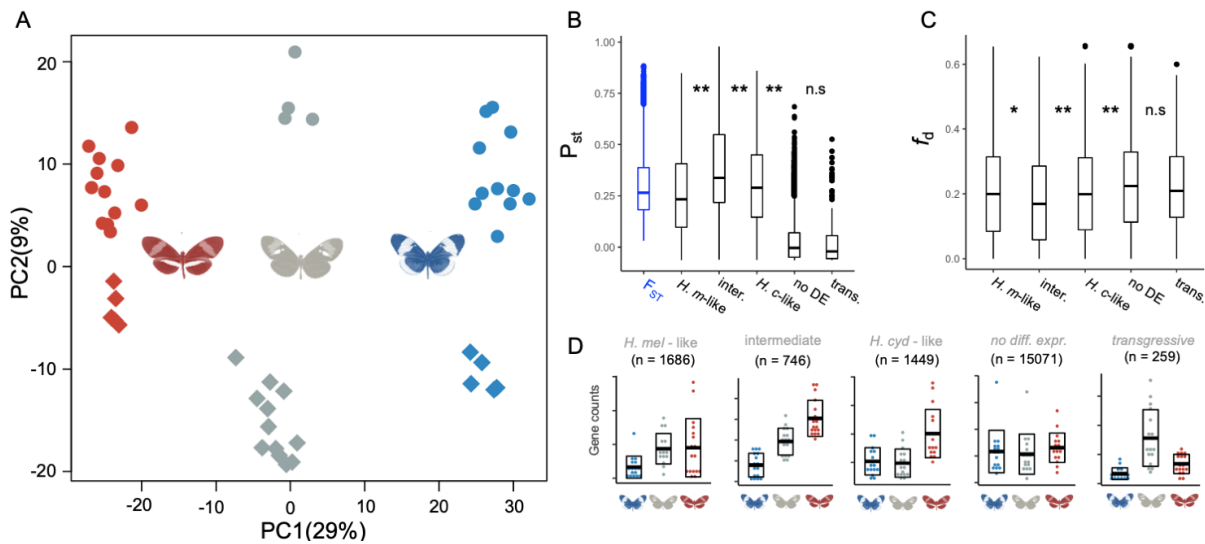

**Figure 4. Divergence in gene expression between *H. m. rosina* and *H. c. chioneus*** (A) Principal component analysis of neural gene expression for differentially expressed genes. *H. c. chioneus* samples are colored in blue, F1 hybrids in gray, *H. m. rosina* in red. Sequencing year is denoted by dot shape: circular (2014), rhomboid (2019). (B) Medians, interquartile ranges and distributions of  $F_{ST}$  and  $P_{ST}$  values for genes assigned to different categories based on their expression profiles in F1 hybrids (M-L is *melpomene*-like, I is intermediate, C-L is *cydno*-like, N is no difference, T is transgressive). Below, examples of expression profiles for genes belonging to these different gene categories, with horizontal bars indicating the mean and boxplots delineating +/- sd of the normalized gene counts. n indicates quantity (considering all genes) (C) Median, interquartile range and distributions of admixture proportions ( $f_d$ ), estimated in 100kb windows, between *H. cydno* and *H. melpomene*, for different gene categories. \*\*= $p < 0.001$ , \*= $p < 0.01$ , n.s.=not significant, Kruskal-Wallis test with post-hoc Dunn test, with Bonferroni correction.

402           In summary, using a large sample of multiple, geographically disparate populations we  
403 have shown that divergent selection during the evolution of micro-habitat partitioning has driven  
404 evolution in brain composition and gene expression between *melpomene* and *cydno* clades of  
405 *Heliconius* butterflies. These changes are heritable, significantly exceed expected rates of neutral  
406 divergence, and result in disrupted traits in F1 hybrids. Neuroanatomical divergence is restricted  
407 to the visual neuropils, strongly suggesting that adaptation to contrasting sensory niches  
408 contributes to hybrid fitness deficits. This data is consistent with known differences between the  
409 two clades in ecology [25,30,32–34,82] and visual sensitivity [34,35]. While disruptive selection  
410 on colour pattern has a major role in maintaining reproductive isolation between species [83–85],  
411 habitat divergence is thought to be critical to ‘complete’ speciation in *Heliconius* [30,31]. Whether  
412 shifts in colour pattern or habitat preference initiate this process is unclear, but given the quality  
413 of the aposematic signal is environment and community dependent [86–88], changes in  
414 microhabitat preference, and the corresponding neurobiological adaptation to the derived  
415 conditions, likely occur at the early stages of divergence. Together, divergent ecological selection  
416 on behaviour, and their neural bases, in addition to disruptive selection on mimetic warning  
417 patterns would provide strong, coincident barriers to gene flow [89], thereby facilitating speciation.

418           At a macroevolutionary scale, diverse studies, ranging from recent adaptive radiations in  
419 cichlid fish [90] to more ancient diversification of mammals [91], highlight the importance of  
420 ecological transitions in driving divergence in sensory regions of the brain. However, whether  
421 these changes in brain composition accumulate after ecological transitions, or play a significant  
422 role in facilitating them is unclear. Our data provide new evidence that brain evolution has a  
423 facultative role in ecological transitions. Our results mirror a previous analysis of divergence in  
424 brain morphology between *H. himera* and *H. erato* [23], which are isolated across a steep  
425 ecological transition between dense lowland wet forest and more open higher altitude dry forest  
426 [28,92]. In this case, heritable shifts in investment are again most notable in sensory neuropils  
427 [23]. Similar conclusions can be drawn from the evolution of several fish ecotypes [13,14,93–95],  
428 however, here environment-dependent plasticity plays a dominant role in producing population  
429 differences [13,14,96]. By demonstrating heritable divergence in brain composition, rates of  
430 neural gene expression that exceed neutral expectations, and hybrid disruption at both an  
431 anatomical and molecular level, our data provides a robust case for adaptive neural divergence.  
432 Given the prevalent role of niche separation and environmental gradients in many adaptive  
433 radiations, we suggest that local adaptation in brain and sensory systems may have an  
434 underappreciated role during ecological speciation.

435

## 436 **Methods**

437

### 438 *Animals*

439 We sampled three pairs of species in Costa Rica, Panama and Peru, and a population of *H. m.*  
440 *melpomene* from French Guiana (Figure 1) with permission from local authorities (Supplementary  
441 Information). All wild individuals (n=77) were hand netted and brain tissue was fixed *in situ* in a  
442 ZnCl<sub>2</sub>-formalin solution [97] within a few hours of collection. Common garden samples of *H. c.*  
443 *chioneus* and *H. m. rosina* were reared at the Smithsonian Tropical Research Institute's Gamboa  
444 insectaries. Hybrids were produced from multiple *H. c. chioneus* x *H. m. rosina* crosses in 2013  
445 and 2019. Insectary individuals were dissected at 2-3 weeks for neuroanatomical (n=30), and 9-  
446 15 days for gene expression samples (n=49) (Table S1,S2).

447

### 448 *Immunohistochemistry and imaging*

449 Brain structure was revealed using immunofluorescence staining against a vesicle-associated  
450 protein at presynaptic sites, synapsin (anti-SYNORF1; obtained from the Developmental Studies  
451 Hybridoma Bank, University of Iowa, Department of Biological Sciences, Iowa City, IA 52242,  
452 USA; RRID: AB\_2315424) and Cy2-conjugated affinity-purified polyclonal goat anti-mouse IgG  
453 (H+L) antibody (Jackson ImmunoResearch Laboratories, West Grove, PA), obtained from  
454 Stratech Scientific Ltd., Newmarket, Suffolk, UK (Jackson ImmunoResearch Cat No. 115-225-  
455 146, RRID: AB\_2307343). All imaging was performed on a confocal laser-scanning microscope  
456 (Leica TCS SP5 or SP8, Leica Microsystem, Mannheim, Germany) using a 10x dry objective with  
457 a numerical aperture of 0.4 (Leica Material No. 11506511), a mechanical z-step of 2µm and an x-  
458 y resolution of 512 x 512 pixels. Confocal scans were segmented using Amira 5.5 (Thermo Fisher  
459 Scientific) to produce estimates of neuropil volumes.

460

### 461 *RNA extraction and sequencing*

462 Brains were dissected out of the head capsule in cold (4 °C) 0.01M PBS. Total RNA was extracted  
463 using TRIzol Reagent (Thermo Fisher, Waltham, MA, USA) and a PureLink RNA Mini Kit, with  
464 PureLink DNase digestion on column (Thermo Fisher, Waltham, MA, USA). Illumina 150bp  
465 paired-end RNA-seq libraries were prepared and sequenced at Novogene (Hong Kong, China).  
466 After trimming adaptor and low-quality bases from raw reads using TrimGalore v.0.4.4  
467 ([www.bioinformatics.babraham.ac.uk/projects](http://www.bioinformatics.babraham.ac.uk/projects)), Illumina reads were mapped to the *H.*  
468 *melpomene* 2 genome [98]/*H. melpomene* 2.5 annotation [99] using STAR v.2.4.2a in 2-pass

469 mode [100]. We kept only reads that mapped in ‘proper pairs’, using Samtools [101]. The number  
470 of reads mapping to each gene was estimated with HTseq v. 0.9.1 (model=union) [102].

471

#### 472 *Statistical analyses of neuropil volumes*

473 Non-allometric differences in brain component sizes were estimated using nested linear models  
474 in lme4 R [103]. Linear models included each brain component as the dependent variable, the  
475 volume of unsegmented central brain neuropil (rCBR), and taxonomic/experimental grouping as  
476 independent variables, with sex and country (where relevant) included as random factors. The  
477 log-likelihoods of nested models were compared using likelihood ratio tests and a  $\chi^2$  distribution,  
478 with sequential Bonferroni correction [104]. For neuropils showing a significant clade/species  
479 effect, we subsequently explored the scaling parameters responsible for group differences using  
480 SMATR v.3.4-3 [105]. Partial-Mantel tests were performed between pairwise differences in  
481 neuropil volumes and  $F_{ST}$  [54], controlling for rCBR, using ECODIST [106] with Pearson  
482 correlations and 1000 permutations. We calculated  $P_{ST}$  using the PSTAT package [107] with a  
483  $c/h^2$  ratio of 1, and allometric correction with the res() function. The significance of  $P_{ST}$  was  
484 calculated as the proportion of the  $F_{ST}$  distribution [65] that was above each  $P_{ST}$  value. Finally, to  
485 identify intermediate traits in hybrids we also performed Principal Component Analysis and  
486 ANOVAs among parental and hybrid individuals, with post-hoc Tukey-tests to compare group  
487 means, using base R packages [108].

488

#### 489 *Statistical analyses of gene expression data*

490 Differential gene expression analyses were conducted in DESeq2 [109], including sex and  
491 sequencing batch as random factors, with a minimum fold change in expression of 2 to counter  
492 effects of tissue composition [67]. We conducted a Principal Component Analysis on rlog-  
493 transformed gene count data (as implemented in DESeq2) to inspect clustering of expression  
494 profiles. ANOVAs on normalized gene expression counts of species and hybrids, with post-hoc  
495 Tukey tests, using base R packages [108].  $P_{ST}$  from normalized gene counts in *H. m. rosina* and  
496 *H. c. chioneus* was calculated following Uebbing et al. [110], with  $h^2$  set to 0.5 and  $c$  to 1.0.  
497 Estimated admixture proportions ( $f_d$ ) between *H. m. rosina* and *H. c. chioneus*, and population  
498 recombination rates ( $\rho$ ) were taken from Martin et al. [68]. To test for an association between  
499 low gene flow and high  $P_{ST}$  we fitted a linear mixed model:  $f_d \sim \rho + P_{ST} + (1|chromosome)$ , with  
500 a Gaussian distribution, using 100kb non-overlapping windows of  $f_d$ . GO enrichment tests were  
501 performed using InterProScan v.5 [111] to retrieve gene ontology (GO) terms for the Hmel2.5

502 gene set, and the TopGO package in R [112], using the “elim” algorithm, which corrects for non-  
503 independence among GO terms.

504

505 Full descriptions of the methodology, and the neuroanatomical dataset are available in the  
506 Supplementary Information and will be deposited on DataDryad on manuscript acceptance (DOI  
507 pending), along with R code. The raw reads from the genetic dataset will be deposited on The  
508 European Nucleotide Archive on manuscript acceptance (accession ID pending).

509

## 510 **Acknowledgements**

511 We are indebted to the environmental agencies in Costa Rica, Panama, Peru, and French Guiana  
512 for permissions to carry out this work. We thank Neil Rosser, Ronald Mori Pezo and the  
513 Dasmahapatra group for assistance in Peru; the Organization for Tropical Studies at Las Cruces  
514 and La Selva, and Le Leona Eco Lodge for assistance in Costa Rica; Adriana Tapia, Moises  
515 Abanto, Oscar Paneso, Cruz Batista Saez, Chi-Yun Kuo, Morgan Oberweiser, the McMillan ,  
516 Jiggins and EBaB labs, and STRI for support at the Gamboa insectaries, Panama. We also thank  
517 the University College London Confocal Imaging facility, and Matt Wayland and the Dept. of  
518 Zoology Imaging Facility, University of Cambridge, for assistance. This work was funded by a  
519 Royal Commission for the Great Exhibition Research Fellowship, a Leverhulme Trust Early  
520 Career Fellowship, a short-term STRI Fellowship, British Ecological Society Research Grant  
521 (3066) and a NERC IRF (NE/N014936/1) to SHM, and a Deutsche Forschungsgemeinschaft Emmy  
522 Noether fellowship and research grant (GZ: ME 4845/1-1) to RMM.

523

## 524 **Author contributions**

525 SHM conceived the research with RMM. SHM collected all field and insectary samples for  
526 neuroanatomical data, processed and imaged these samples. MR and RMM collected samples  
527 for gene expression analyses. SHM and MR analyzed the data. SHM, WOM and RMM secured  
528 funding, contributed resources and provided supervision. SHM wrote the manuscript with  
529 contributions from all authors.

530

## 531 **Declaration of interests**

532 The authors declare no competing interests.

533

534

535



## 536 References

- 537 1. Rundle, H.D., and Nosil, P. (2005). Ecological speciation. *Ecol. Lett.* 8, 336–352.
- 538 2. Schluter, D. (2009). Evidence for ecological speciation and its alternative. *Science* 323,  
539 737–741.
- 540 3. Jerry A Coyne, and H. Allen Orr (2004). *Speciation* (Oxford: Oxford University Press).
- 541 4. Cummings, M.E., and Endler, J.A. (2018). 25 Years of sensory drive: the evidence and its  
542 watery bias. *Curr. Zool.* 64, 471–484.
- 543 5. Price, T.D. (2017). Sensory drive, color, and color vision. *Am. Nat.* 190, 157–170.
- 544 6. Barton, R.A. (1998). Visual specialization and brain evolution in primates. *Proc. R. Soc.*  
545 *Lond. B Biol. Sci.* 265, 1933–1937.
- 546 7. Carlson, B.A., and Arnegard, M.E. (2011). Neural innovations and the diversification of  
547 African weakly electric fishes. *Commun. Integr. Biol.* 4, 720–725.
- 548 8. Vélez, A., Kohashi, T., Lu, A., and Carlson, B.A. (2017). The cellular and circuit basis for  
549 evolutionary change in sensory perception in mormyrid fishes. *Sci. Rep.* 7 (1), 1-18.
- 550 9. Sukhum, K.V., Shen, J., and Carlson, B.A. (2018). Extreme enlargement of the cerebellum  
551 in a clade of teleost fishes that evolved a novel active sensory system. *Curr. Biol.* 28,  
552 3857-3863.e3.
- 553 10. Stöckl, A., Heinze, S., Charalabidis, A., el Jundi, B., Warrant, E., and Kelber, A. (2016).  
554 Differential investment in visual and olfactory brain areas reflects behavioural choices in  
555 hawk moths. *Sci. Rep.* 6, 26041.
- 556 11. Loomis, C., Peuß, R., Jaggard, J., Wang, Y., McKinney, S., Raftopoulos, S., Raftopoulos,  
557 A., Whu, D., Green, M., McGaugh, S.E., *et al.* (2019). An adult brain atlas reveals broad  
558 neuroanatomical changes in independently evolved populations of Mexican cavefish.  
559 bioRxiv. Available at: <http://biorxiv.org/lookup/doi/10.1101/648188>.
- 560 12. Snell-Rood, E.C. (2013). An overview of the evolutionary causes and consequences of  
561 behavioural plasticity. *Anim. Behav.* 85, 1004–1011.
- 562 13. Gonda, A., Herczeg, G., and Merilä, J. (2011). Population variation in brain size of nine-  
563 spined sticklebacks (*Pungitius pungitius*) - local adaptation or environmentally induced  
564 variation? *BMC Evol. Biol.* 11.
- 565 14. Eifert, C., Farnworth, M., Schulz-Mirbach, T., Riesch, R., Bierbach, D., Klaus, S., Wurster,  
566 A., Tobler, M., Streit, B., Indy, J.R., *et al.* (2015). Brain size variation in extremophile fish:  
567 local adaptation versus phenotypic plasticity: Brain size variation in extremophile fish. *J.*  
568 *Zool.* 295, 143–153.
- 569 15. Wcislo, W.T. (1989). Behavioral environments and evolutionary change. *Annu. Rev. Ecol.*  
570 *Syst.* 20, 137–69.

- 571 16. Dekker, T., Ibba, I., Siju, K.P., Stensmyr, M.C., and Hansson, B.S. (2006). Olfactory shifts  
572 parallel superspecialism for toxic fruit in *Drosophila melanogaster* sibling, *D. sechellia*.  
573 *Curr. Biol.* 16, 101–109.
- 574 17. Linn, C., Feder, J.L., Nojima, S., Dambroski, H.R., Berlocher, S.H., and Roelofs, W.  
575 (2003). Fruit odor discrimination and sympatric host race formation in *Rhagoletis*. *Proc.*  
576 *Natl. Acad. Sci.* 100, 11490–11493.
- 577 18. Linz, J., Baschwitz, A., Strutz, A., Dweck, H.K.M., Sachse, S., Hansson, B.S., and  
578 Stensmyr, M.C. (2013). Host plant-driven sensory specialization in *Drosophila erecta*.  
579 *Proc. R. Soc. B Biol. Sci.* 280, 20130626.
- 580 19. McBride, C.S., Baier, F., Omondi, A.B., Spitzer, S.A., Lutomiah, J., Sang, R., Ignell, R.,  
581 and Vosshall, L.B. (2014). Evolution of mosquito preference for humans linked to an  
582 odorant receptor. *Nature* 515, 222–227.
- 583 20. Prieto-Godino, L.L., Rytz, R., Cruchet, S., Bargeton, B., Abuin, L., Silbering, A.F., Ruta, V.,  
584 Dal Peraro, M., and Benton, R. (2017). Evolution of acid-sensing olfactory circuits in  
585 *Drosophilids*. *Neuron* 93, 661-676.e6.
- 586 21. Tait, C., Batra, S., Ramaswamy, S.S., Feder, J.L., and Olsson, S.B. (2016). Sensory  
587 specificity and speciation: a potential neuronal pathway for host fruit odour discrimination in  
588 *Rhagoletis pomonella*. *Proc. R. Soc. B Biol. Sci.* 283, 20162101.
- 589 22. Seeholzer, L.F., Seppo, M., Stern, D.L., and Ruta, V. (2018). Evolution of a central neural  
590 circuit underlies *Drosophila* mate preferences. *Nature* 559, 564–569.
- 591 23. Montgomery, S.H., and Merrill, R.M. (2017). Divergence in brain composition during the  
592 early stages of ecological specialization in *Heliconius* butterflies. *J. Evol. Biol.* 30, 571–582.
- 593 24. Keeseey, I.W., Grabe, V., Knaden, M., and Hansson, B.S. (2019). Niche partitioning as a  
594 selective pressure for the evolution of the *Drosophila* nervous system. Available at:  
595 <http://biorxiv.org/lookup/doi/10.1101/690529>.
- 596 25. Brown, K.S. (1981). The biology of *Heliconius* and related genera. *Annu. Rev. Entomol.* 26,  
597 427–457.
- 598 26. Merrill, R.M., Dasmahapatra, K.K., Davey, J.W., Dell'Aglio, D.D., Hanly, J.J., Huber, B.,  
599 Jiggins, C.D., Joron, M., Kozak, K.M., Llaurens, V., *et al.* (2015). The diversification of  
600 *Heliconius* butterflies: what have we learned in 150 years? *J. Evol. Biol.* 28, 1417–1438.
- 601 27. Jiggins, C.D., and Mallet, J. (2000). Bimodal hybrid zones and speciation. *Trends Ecol.*  
602 *Evol.* 15, 250–255.
- 603 28. McMillan, W.O., Jiggins, C.D., and Mallet, J. (1997). What initiates speciation in passion-  
604 vine butterflies? *Proc. Natl. Acad. Sci.* 94, 8628–8633.
- 605 29. Jiggins, C.D. (2008). Ecological speciation in mimetic butterflies. *BioScience* 58, 541–548.

- 606 30. Merot, C., Salazar, C., Merrill, R.M., Jiggins, C.D., and Joron, M. (2017). What shapes the  
607 continuum of reproductive isolation? Lessons from *Heliconius* butterflies. *Proc. R. Soc. B*  
608 *Biol. Sci.* 284, 10.
- 609 31. Mallet, J., McMillan, W.O., Jiggins, C.D. (1998). Mimicry and warning color at the boundary  
610 between races and species. In *Endless Forms: Species and Speciation* (Oxford: Oxford  
611 University Press).
- 612 32. Smiley, J. (1978). The host plant ecology of *Heliconius* Butterflies in Northeastern Costa  
613 Rica. PhD Thesis, University of Texas at Austin.
- 614 33. Estrada, C., and Jiggins, C.D. (2002). Patterns of pollen feeding and habitat preference  
615 among *Heliconius* species. *Ecol. Entomol.* 27, 448–456.
- 616 34. Seymoure, B.M. (2016). *Heliconius* in a new light: the effects of light environments on  
617 mimetic coloration, behavior, and visual systems. PhD Thesis, Arizona State University.
- 618 35. Seymoure, B.M., Mcmillan, W.O., and Rutowski, R. (2015). Peripheral eye dimensions in  
619 Longwing (*Heliconius*) butterflies vary with body size and sex but not light environment nor  
620 mimicry ring. *J. Res. Lepid.* 48, 83-92.
- 621 36. Mallet, J., Beltrán, M., Neukirchen, W., and Linares, M. (2007). Natural hybridization in  
622 heliconiine butterflies: the species boundary as a continuum. *BMC Evol. Biol.* 7, 28.
- 623 37. Stöckl, A.L., Ribi, W.A., and Warrant, E.J. (2016). Adaptations for nocturnal and diurnal  
624 vision in the hawkmoth lamina: visual adaptations in the Hawkmoth lamina. *J. Comp.*  
625 *Neurol.* 524, 160–175.
- 626 38. Stöckl, A.L., O'Carroll, D.C., and Warrant, E.J. (2020). Hawkmoth lamina monopolar cells  
627 act as dynamic spatial filters to optimize vision at different light levels. *Sci. Adv.* 6,  
628 eaaz8645.
- 629 39. Borst, A. (2009). *Drosophila's* View on Insect Vision. *Curr. Biol.* 19, R36–R47.
- 630 40. Morante, J., and Desplan, C. (2004). Building a projection map for photoreceptor neurons  
631 in the *Drosophila* optic lobes. *Semin. Cell Dev. Biol.* 15, 137–143.
- 632 41. Rister, J., Pauls, D., Schnell, B., Ting, C.-Y., Lee, C.-H., Sinakevitch, I., Morante, J.,  
633 Strausfeld, N.J., Ito, K., and Heisenberg, M. (2007). Dissection of the peripheral motion  
634 channel in the visual system of *Drosophila melanogaster*. *Neuron* 56, 155–170.
- 635 42. Paulk, A.C., Dacks, A.M., Phillips-Portillo, J., Fellous, J.-M., and Gronenberg, W. (2009).  
636 Visual processing in the central bee brain. *J. Neurosci.* 29, 9987–9999.
- 637 43. Hausen K (1984). The lobula-complex of the fly: structure, function and significance in  
638 visual behaviour. In Ali, M.A. (eds) *Photoreception and vision in invertebrates NATO ASI*  
639 *Series (Series A: Life Sciences)*. (Boston, MA: Springer).
- 640 44. Buschbeck, E.K., and Strausfeld, N.J. The relevance of neural architecture to visual  
641 performance: Phylogenetic conservation and variation in dipteran visual systems. *J. Comp.*  
642 *Neurol.* 383, 282–304.

- 643 45. Homberg, U. and Würden, S. (1997). Movement-sensitive, polarization-sensitive, and light-  
644 sensitive neurons of the medulla and accessory medulla of the locust, *Schistocerca*  
645 *gregaria*. J. Comp. Neurol. 386, 329–346.
- 646 46. Heinze, S., and Reppert, S.M. (2012). Anatomical basis of sun compass navigation I: The  
647 general layout of the monarch butterfly brain. J. Comp. Neurol. 520, 1599–1628.
- 648 47. Montgomery, S.H., and Ott, S.R. (2015). Brain composition in *Godyris zavaleta*, a diurnal  
649 butterfly, reflects an increased reliance on olfactory information. J. Comp. Neurol. 523,  
650 869–891.
- 651 48. Montgomery, S.H., Merrill, R.M., and Ott, S.R. (2016). Brain composition in *Heliconius*  
652 butterflies, posteclosion growth and experience-dependent neuropil plasticity. J. Comp.  
653 Neurol. 524, 1747–1769.
- 654 49. Kinoshita, M., Shimohigashi, M., Tominaga, Y., Arikawa, K., and Homberg, U. (2015).  
655 Topographically distinct visual and olfactory inputs to the mushroom body in the  
656 Swallowtail butterfly, *Papilio xuthus*. J. Comp. Neurol. 523, 162–182.
- 657 50. Pfeiffer, K., Kinoshita, M., and Homberg, U. (2005). Polarization-sensitive and light-  
658 sensitive neurons in two parallel pathways passing through the anterior optic tubercle in  
659 the locust brain. J. Neurophysiol. 94, 3903–3915.
- 660 51. Mappes, M., and Homberg, U. (2007). Surgical lesion of the anterior optic tract abolishes  
661 polarotaxis in tethered flying locusts, *Schistocerca gregaria*. J. Comp. Physiol. A 193, 43–  
662 50.
- 663 52. Heinze, S. (2014). Polarized-light processing in insect brains: recent insights from the  
664 desert locust, the monarch butterfly, the cricket, and the fruit fly. In Hováth, G. (eds)  
665 Polarized light and polarization vision in animal sciences (Berlin, Heidelberg: Springer).
- 666 53. Keeseey, I.W., Grabe, V., Gruber, L., Koerte, S., Obiero, G.F., Bolton, G., Khallaf, M.A.,  
667 Kunert, G., Lavista-Llanos, S., Valenzano, D.R., *et al.* (2019). Inverse resource allocation  
668 between vision and olfaction across the genus *Drosophila*. Nat. Commun. 10, 1162.
- 669 54. Arias, C.F., Salazar, C., Rosales, C., Kronforst, M.R., Linares, M., Bermingham, E., and  
670 McMillan, W.O. (2014). Phylogeography of *Heliconius cydno* and its closest relatives:  
671 disentangling their origin and diversification. Mol. Ecol. 23, 4137–4152.
- 672 55. Mérot, C., Frérot, B., Leppik, E., and Joron, M. (2015). Beyond magic traits: Multimodal  
673 mating cues in *Heliconius* butterflies. Evolution 69, 2891–2904.
- 674 56. Kronforst, M.R., Young, L.G., Blume, L.M., and Gilbert, L.E. (2006). Multilocus analyses of  
675 admixture and introgression among hybridizing *Heliconius* butterflies. Evolution 60, 1254–  
676 1268.
- 677 57. Kronforst, M.R., Young, L.G., Kapan, D.D., McNeely, C., O’Neill, R.J., and Gilbert, L.E.  
678 (2006). Linkage of butterfly mate preference and wing color preference cue at the genomic  
679 location of wingless. Proc. Natl. Acad. Sci. 103, 6575–6580.
- 680 58. Julian S Huxley (1932). Problems of relative growth (London: Methuen & Co. Ltd).

- 681 59. Gould, S.J. (1971). Geometric similarity in allometric growth: a contribution to the problem  
682 of scaling in the evolution of size. *Am. Nat.* 105, 113–136.
- 683 60. Voje, K.L., Hansen, T.F., Egset, C.K., Bolstad, G.H., and Pélabon, C. (2014). Allometric  
684 constraints and the evolution of allometry. *Evolution* 68, 866–885.
- 685 61. Pélabon, C., Firmat, C., Bolstad, G.H., Voje, K.L., Houle, D., Cassara, J., Rouzic, A.L., and  
686 Hansen, T.F. (2014). Evolution of morphological allometry. *Ann. N. Y. Acad. Sci.* 1320, 58–  
687 75.
- 688 62. Montgomery, S.H. (2013). The human frontal lobes: not relatively large but still  
689 disproportionately important? A commentary on Barton and Venditti. *Brain. Behav. Evol.*  
690 82, 147–149.
- 691 63. Montgomery, S.H., Mundy, N.I., and Barton, R.A. (2016). Brain evolution and development:  
692 adaptation, allometry and constraint. *Proc. R. Soc. B Biol. Sci.* 283, 20160433.
- 693 64. Brommer, J.E. (2011). Whither Pst? The approximation of Qst by Pst in evolutionary and  
694 conservation biology. *J. Evol. Biol.* 24, 1160–1168.
- 695 65. Martin, S.H., Dasmahapatra, K.K., Nadeau, N.J., Salazar, C., Walters, J.R., Simpson, F.,  
696 Blaxter, M., Manica, A., Mallet, J., and Jiggins, C.D. (2013). Genome-wide evidence for  
697 speciation with gene flow in *Heliconius* butterflies. *Genome Res.* 23, 1817–1828.
- 698 66. Whitehead, A., and Crawford, D.L. (2006). Neutral and adaptive variation in gene  
699 expression. *Proc. Natl. Acad. Sci.* 103, 5425–5430.
- 700 67. Montgomery, S.H., and Mank, J.E. (2016). Inferring regulatory change from gene  
701 expression: the confounding effects of tissue scaling. *Mol. Ecol.* 25, 5114–5128.
- 702 68. Martin, S.H., Davey, J.W., Salazar, C., and Jiggins, C.D. (2019). Recombination rate  
703 variation shapes barriers to introgression across butterfly genomes. *PLOS Biol.* 17,  
704 e2006288.
- 705 69. Haerty, W., and Singh, R.S. (2006). Gene regulation divergence is a major contributor to  
706 the evolution of Dobzhansky–Muller incompatibilities between species of *Drosophila*. *Mol.*  
707 *Biol. Evol.* 23, 1707–1714.
- 708 70. Ortíz-Barrientos, D., Counterman, B.A., and Noor, M.A.F. (2006). Gene expression  
709 divergence and the origin of hybrid dysfunctions. *Genetica* 129, 71–81.
- 710 71. Landry, C.R., Hartl, D.L., and Ranz, J.M. (2007). Genome clashes in hybrids: insights from  
711 gene expression. *Heredity* 99, 483–493.
- 712 72. Renaut, S., and Bernatchez, L. (2011). Transcriptome-wide signature of hybrid breakdown  
713 associated with intrinsic reproductive isolation in lake whitefish species pairs (*Coregonus*  
714 spp. Salmonidae). *Heredity* 106, 1003–1011.
- 715 73. Michalak, P., and Noor, M.A.F. (2003). Genome-wide patterns of expression in *Drosophila*  
716 pure species and hybrid males. *Mol. Biol. Evol.* 20, 1070–1076.

- 717 74. Ranz, J.M., Kalsand Namgyal, Greg Gibson, and Daniel L Hartl (2004). Anomalies in the  
718 expression profile of interspecific hybrids of *Drosophila melanogaster* and *Drosophila*  
719 *simulans*. *Genome Res.* 14, 373–379.
- 720 75. Mavarez, J., Audet, C., and Bernatchez, L. (2009). Major disruption of gene expression in  
721 hybrids between young sympatric anadromous and resident populations of brook charr (  
722 *Salvelinus fontinalis* Mitchill). *J. Evol. Biol.* 22, 1708–1720.
- 723 76. Wurmser, F., Ogereau, D., Mary-Huard, T., Loriod, B., Joly, D., and Montchamp-Moreau,  
724 C. (2011). Population transcriptomics: insights from *Drosophila simulans*, *Drosophila*  
725 *sechellia* and their hybrids. *Genetica* 139, 465–477.
- 726 77. Ometto, L., Ross, K.G., Shoemaker, D., and Keller, L. (2012). Disruption of gene  
727 expression in hybrids of the fire ants *Solenopsis invicta* and *Solenopsis richteri*. *Mol. Ecol.*  
728 21, 2488–2501.
- 729 78. Rottschmidt, R., and Harr, B. (2007). Extensive additivity of gene expression differentiates  
730 subspecies of the House Mouse. *Genetics* 177, 1553–1567.
- 731 79. Whiteley, A.R., Derome, N., Rogers, S.M., St-Cyr, J., Laroche, J., Labbe, A., Nolte, A.,  
732 Renaut, S., Jeukens, J., and Bernatchez, L. (2008). The phenomics and expression  
733 quantitative trait locus mapping of brain transcriptomes regulating adaptive divergence in  
734 lake whitefish species pairs (*Coregonus* sp.). *Genetics* 180, 147–164.
- 735 80. Filteau, M., Pavey, S.A., St-Cyr, J., and Bernatchez, L. (2013). Gene coexpression  
736 Networks reveal key drivers of phenotypic divergence in lake whitefish. *Mol. Biol. Evol.* 30,  
737 1384–1396.
- 738 81. Catalan, A., Briscoe, A.D., and Höhna, Sebastian (2018). Drift and directional selection are  
739 the evolutionary forces driving gene expression divergence in eye and brain tissue of  
740 *Heliconius* butterflies. *Genetics* 213, 581–594.
- 741 82. Merrill, R.M., Naisbit, R.E., Mallet, J., and Jiggins, C.D. (2013). Ecological and genetic  
742 factors influencing the transition between host-use strategies in sympatric *Heliconius*  
743 butterflies. *J. Evol. Biol.* 26, 1959–1967.
- 744 83. Merrill, R.M., Wallbank, R.W.R., Bull, V., Salazar, P.C.A., Mallet, J., Stevens, M., and  
745 Jiggins, C.D. (2012). Disruptive ecological selection on a mating cue. *Proc. R. Soc. B Biol.*  
746 *Sci.* 279, 4907–4913.
- 747 84. Naisbit, R.E., Jiggins, C.D., and Mallet, J. (2001). Disruptive sexual selection against  
748 hybrids contributes to speciation between *Heliconius cydno* and *Heliconius melpomene*.  
749 *Proc. R. Soc. Lond. B Biol. Sci.* 268, 1849–1854.
- 750 85. Jiggins, C.D., Naisbit, R.E., Coe, R.L., and Mallet, J. (2001). Reproductive isolation caused  
751 by colour pattern mimicry. *Nature* 411, 302–305.
- 752 86. Chouteau, M., Arias, M., and Joron, M. (2016). Warning signals are under positive  
753 frequency-dependent selection in nature. *Proc. Natl. Acad. Sci.* 113, 2164–2169.

- 754 87. Dell’Aglia, D.D., Troscianko, J., McMillan, W.O., Stevens, M., and Jiggins, C.D. (2018).  
755 The appearance of mimetic *Heliconius* butterflies to predators and conspecifics. *Evolution*  
756 72, 2156–2166.
- 757 88. Seymoure, B.M., Raymundo, A., McGraw, K.J., Owen McMillan, W., and Rutowski, R.L.  
758 (2018). Environment-dependent attack rates of cryptic and aposematic butterflies. *Curr.*  
759 *Zool.* 64, 663–669.
- 760 89. Butlin, R.K., and Smadja, C.M. (2018). Coupling, reinforcement, and speciation. *Am. Nat.*  
761 191, 155–172.
- 762 90. Robert Huber, Moira J van Staaden, Les S Kaufman, and Karel F Liem (1997).  
763 Microhabitat use, trophic patterns, and the evolution of brain structure in African cichlids.  
764 *Brain Behav. Evol.* 50, 167–182.
- 765 91. Barton, R.A. (1995). Evolutionary radiation of visual and olfactory brain systems in  
766 primates, bats and insectivores. *Philos. Trans. R. Soc. Lond. B. Biol. Sci.* 348, 381–392.
- 767 92. Jiggins, C.D., McMillan, W.O., Neukirchen, W., and Mallet, J. (1996). What can hybrid  
768 zones tell us about speciation? The case of *Heliconius erato* and *H. himera* (Lepidoptera:  
769 Nymphalidae). *Biol. J. Linn. Soc.* 59, 221–242.
- 770 93. Gonda, A., Herczeg, G., and Merilä, J. (2009). Adaptive brain size divergence in nine-  
771 spined sticklebacks (*Pungitius pungitius*)? *J. Evol. Biol.* 22, 1721–1726.
- 772 94. Park, P.J., and Bell, M.A. (2010). Variation of telencephalon morphology of the threespine  
773 stickleback (*Gasterosteus aculeatus*) in relation to inferred ecology. *J. Evol. Biol.* 23, 1261–  
774 1277.
- 775 95. Keagy, J., Braithwaite, V.A., and Boughman, J.W. (2018). Brain differences in ecologically  
776 differentiated sticklebacks. *Curr. Zool.* 64, 243–250.
- 777 96. Park, P.J., Chase, I., and Bell, M.A. (2012). Phenotypic plasticity of the threespine  
778 stickleback *Gasterosteus aculeatus* telencephalon in response to experience in captivity.  
779 *Curr. Zool.* 58, 189–210.
- 780 97. Ott, S.R. (2008). Confocal microscopy in large insect brains: Zinc–formaldehyde fixation  
781 improves synapsin immunostaining and preservation of morphology in whole-mounts. *J.*  
782 *Neurosci. Methods* 172, 220–230.
- 783 98. Davey, J.W., Chouteau, M., Barker, S.L., Maroja, L., Baxter, S.W., Simpson, F., Merrill,  
784 R.M., Joron, M., Mallet, J., Dasmahapatra, K.K., *et al.* (2015). Major improvements to the  
785 *Heliconius melpomene* genome assembly used to confirm 10 chromosome fusion events  
786 in 6 million years of butterfly evolution. *G3* 6, 695–708.
- 787 99. Pinharanda, A., Rousselle, M., Martin, S.H., Hanly, J.J., Davey, J.W., Kumar, S., Galtier,  
788 N., and Jiggins, C.D. (2019). Sexually dimorphic gene expression and transcriptome  
789 evolution provide mixed evidence for a fast-Z effect in *Heliconius*. *J. Evol. Biol.* 32, 194–  
790 204.

- 791 100. Dobin, A., Davis, C.A., Schlesinger, F., Drenkow, J., Zaleski, C., Jha, S., Batut, P.,  
792 Chaisson, M., and Gingeras, T.R. (2013). STAR: ultrafast universal RNA-seq aligner.  
793 *Bioinformatics* 29, 15–21.
- 794 101. Li, H., Handsaker, B., Wysoker, A., Fennell, T., Ruan, J., Homer, N., Marth, G., Abecasis,  
795 G., Durbin, R., and 1000 Genome Project Data Processing Subgroup (2009). The  
796 sequence alignment/map format and SAMtools. *Bioinformatics* 25, 2078–2079.
- 797 102. Anders, S., Pyl, P.T., and Huber, W. (2015). HTSeq--a Python framework to work with  
798 high-throughput sequencing data. *Bioinformatics* 31, 166–169.
- 799 103. Bates, D., Maechler, M., Bolker, B., Walker, S., Christensen, R.H.B, Singmann, H., Dai, B.,  
800 Scheipl, F., Grothendieck, G., Green, P., and Fox, J, Package “lme4.” Available at:  
801 <https://github.com/lme4/lme4/>.
- 802 104. Benjamini, Y., and Hochberg, Y. (1995). Controlling the false discovery rate: a practical  
803 and powerful approach to multiple testing. *J. R. Stat. Soc. Ser. B Methodol.* 57, 289–300.
- 804 105. Warton, D.I., Duursma, R.A., Falster, D.S., and Taskinen, S. (2012). smatr 3- an R  
805 package for estimation and inference about allometric lines. *Methods Ecol. Evol.* 3, 257–  
806 259.
- 807 106. Goslee, S.C., and Urban, D.L. (2007). The ecodist Package for Dissimilarity-based  
808 Analysis of Ecological Data. *J. Stat. Softw.* 22. Available at:  
809 <http://www.jstatsoft.org/v22/i07/>.
- 810 107. Silva, S., Blondeau, Da, and Silva, A., Da (2018). Pstat: An R Package to Assess  
811 Population Differentiation in Phenotypic Traits. *R J.* 10, 447.
- 812 108. R Core Team (2013). R: a language and environment for statistical computing. Available  
813 at: <https://www.r-project.org>
- 814 109. Love, M.I., Huber, W., and Anders, S. (2014). Moderated estimation of fold change and  
815 dispersion for RNA-seq data with DESeq2. *Genome Biol.* 15, 550.
- 816 110. Uebbing, S., Künstner, A., Mäkinen, H., Backström, N., Bolivar, P., Burri, R., Dutoit, L.,  
817 Mugal, C.F., Nater, A., Aken, B., *et al.* (2016). Divergence in gene expression within and  
818 between two closely related flycatcher species. *Mol. Ecol.* 25, 2015–2028.
- 819 111. Jones, P., Binns, D., Chang, H.-Y., Fraser, M., Li, W., McAnulla, C., McWilliam, H.,  
820 Maslen, J., Mitchell, A., Nuka, G., *et al.* (2014). InterProScan 5: genome-scale protein  
821 function classification. *Bioinformatics* 30, 1236–1240.
- 822 112. Alexa, A., and Rahnenfuhrer, J. Gene set enrichment analysis with topGO. Available at:  
823 <http://www.mpi-sb.mpg.de/~alexa>.
- 824
